# Supplementary material
Source: HighWire-hosted journal article supplement (https://bmjopen.bmj.com/content/12/2/e054945)
Supplement: inline-supplementary-material-2 [file inline-supplementary-material-2.pdf]

| Supplementary Table S1. Overview of search terms used for each database |                                                                                                                                                                                                                                                                                                                                                                                                                                                                                                                                                                                                                                                                                                                                                                                                                                                                                                                                                                                                                                                               |
|-------------------------------------------------------------------------|---------------------------------------------------------------------------------------------------------------------------------------------------------------------------------------------------------------------------------------------------------------------------------------------------------------------------------------------------------------------------------------------------------------------------------------------------------------------------------------------------------------------------------------------------------------------------------------------------------------------------------------------------------------------------------------------------------------------------------------------------------------------------------------------------------------------------------------------------------------------------------------------------------------------------------------------------------------------------------------------------------------------------------------------------------------|
| Database                                                                | Search term                                                                                                                                                                                                                                                                                                                                                                                                                                                                                                                                                                                                                                                                                                                                                                                                                                                                                                                                                                                                                                                   |
| EMBASE                                                                  | <p>('opiate agonist'/de OR opiate/de OR 'analgesia'/de OR 'analgesic agent'/de OR 'narcotic analgesic agent'/de OR pain/dm_dt OR 'chronic pain'/dm_dt OR 'backache'/exp/dm_dt OR 'musculoskeletal pain'/dm_dt OR 'osteoarthritis'/exp/dm_dt OR (opiate* OR opioid* OR analgesi* OR ((pain OR osteoarthritis*) NEAR/3 (relief* OR prescri* OR drug* OR agent* OR medication*))) :Ab,ti) AND ('primary health care'/exp OR 'general practitioner'/exp OR 'general practice'/exp OR 'family medicine'/de OR (((primary) NEAR/3 (care OR healthcare)) OR (general NEAR/3 (practitioner* OR practice*)) OR (family NEAR/3 (doctor* OR physician* OR practice* OR medicine*)) OR gp OR gps):ab,ti) AND ('health personnel attitude'/de OR 'physician attitude'/de OR 'prescription'/de OR perception/de OR attitude/de OR (attitude* OR perspective* OR perception* OR belief* OR ((behavior* OR behaviour* OR decision*) NEAR/3 (prescription* OR prescrib*))) :ab,ti) NOT ([animals]/lim NOT [humans]/lim) NOT ([conference abstract]/lim AND [1800-2017]/py)</p> |

|         |                                                                                                                                                                                                                                                                                                                                                                                                                                                                                                                                                                                                                                                                                                                                                                                                                |
|---------|----------------------------------------------------------------------------------------------------------------------------------------------------------------------------------------------------------------------------------------------------------------------------------------------------------------------------------------------------------------------------------------------------------------------------------------------------------------------------------------------------------------------------------------------------------------------------------------------------------------------------------------------------------------------------------------------------------------------------------------------------------------------------------------------------------------|
| MEDLINE | (Analgesics, Opioid/ OR Analgesia/ OR Analgesics/ OR Pain/dt OR exp Back Pain/dt OR Musculoskeletal Pain/dt OR exp Osteoarthritis/dt OR (opiate* OR opioid* OR analgesi* OR ((pain OR osteoarthritis*) ADJ3 (relief* OR prescri* OR drug* OR agent* OR medication*))).ab,ti.) AND (Primary Health Care/ OR General Practitioners/ OR General Practice/ OR Family Practice/ OR (((primary) ADJ3 (care OR healthcare)) OR (general ADJ3 (practitioner* OR practice*)) OR (family ADJ3 (doctor* OR physician* OR practice* OR medicine*)) OR gp OR gps).ab,ti.) AND (Attitude of Health Personnel/ OR Prescriptions/ OR Perception/ OR (attitude* OR perspective* OR perception* OR belief* OR ((behavior* OR behaviour* OR decision*) ADJ3 (prescription* OR prescrib*))).ab,ti.) NOT (exp animals/ NOT humans/) |
|---------|----------------------------------------------------------------------------------------------------------------------------------------------------------------------------------------------------------------------------------------------------------------------------------------------------------------------------------------------------------------------------------------------------------------------------------------------------------------------------------------------------------------------------------------------------------------------------------------------------------------------------------------------------------------------------------------------------------------------------------------------------------------------------------------------------------------|

|                               |                                                                                                                                                                                                                                                                                                                                                                                                                                                                                      |
|-------------------------------|--------------------------------------------------------------------------------------------------------------------------------------------------------------------------------------------------------------------------------------------------------------------------------------------------------------------------------------------------------------------------------------------------------------------------------------------------------------------------------------|
| Web of Science Core Collecion | TS=(((opiate* OR opioid* OR analgesi* OR ((pain OR osteoarthritis*) NEAR/2 (relief* OR prescri* OR drug* OR agent* OR medication*)))) AND (((primary) NEAR/2 (care OR healthcare)) OR (general NEAR/2 (practitioner* OR practice*)) OR (family NEAR/2 (doctor* OR physician* OR practice* OR medicine*)) OR gp OR gps)) AND ((attitude* OR perspective* OR perception* OR belief* OR ((behavior* OR behaviour* OR decision*) NEAR/2 (prescription* OR prescrib*)))) AND DT=(article) |
|-------------------------------|--------------------------------------------------------------------------------------------------------------------------------------------------------------------------------------------------------------------------------------------------------------------------------------------------------------------------------------------------------------------------------------------------------------------------------------------------------------------------------------|
